# Supplementary material for: Spontaneous Ventilation Combined with Double-Lumen Tube Intubation during Thoracic Surgery: A New Anesthesiologic Method Based on 141 Cases over Three Years
Source: MDPI journal article supplement (doi:10.3390/jcm12206457), 2023-10-11
Supplement: s1 [file s1]

**Table S1.** Comparison of demographic parameters of the “blood gas” and “no blood gas” groups.

|                                     |                                              | <b>Blood gas<br/>N=94</b> | <b>No blood gas<br/>N=47</b> | <b>p</b>           |
|-------------------------------------|----------------------------------------------|---------------------------|------------------------------|--------------------|
| <b>Sex</b>                          | Male                                         | 45 (47.87%)               | 22 (46.81%)                  | <sup>1</sup> 0.524 |
|                                     | Female                                       | 49 (52.13%)               | 25 (53.19%)                  |                    |
| <b>Age</b>                          | 18-64                                        | 43 (45.74%)               | 27 (57.45%)                  | <sup>1</sup> 0.129 |
|                                     | 65 -                                         | 51 (54.26%)               | 20 (42.55%)                  |                    |
|                                     | mean $\pm$ SD                                | 63.50 $\pm$ 13.42         | 59.38 $\pm$ 13.58            | <sup>2</sup> 0.089 |
|                                     | min-max                                      | 19-83                     | 22- 80                       |                    |
| <b>BMI</b>                          | Underweight (BMI < 18,5)                     | 2 (2.13%)                 | 4 (8.51%)                    | <sup>3</sup> -     |
|                                     | Normal weight (BMI: 18,5 – 24,9)             | 44 (46.81%)               | 18 (38.3%)                   |                    |
|                                     | Pre-obesity (BMI: 25 – 29,9)                 | 37 (39.36%)               | 12 (25.53%)                  |                    |
|                                     | Obesity class I (BMI: 30 – 34,9)             | 8 (8.51%)                 | 11 (23.4%)                   |                    |
|                                     | Obesity class II (BMI: 35 – 39,9)            | 3 (3.19%)                 | 2 (4.26%)                    |                    |
|                                     | mean $\pm$ SD                                | 25.76 $\pm$ 4.21          | 25.94 $\pm$ 5.12             | <sup>2</sup> 0.829 |
|                                     | min-max                                      | 18.00 - 38.54             | 15.79 - 35.34                |                    |
| <b>ASA score</b>                    | 1                                            | 2 (2.13%)                 | 5 (10.64%)                   | <sup>4</sup> 0.086 |
|                                     | 2                                            | 66 (70.21%)               | 29 (61.7%)                   |                    |
|                                     | 3                                            | 26 (27.66%)               | 13 (27.66%)                  |                    |
| <b>Smokers (current)</b>            | Yes                                          | 33 (35.11%)               | 24 (51.06%)                  | <sup>1</sup> 0.101 |
|                                     | No                                           | 61 (64.89%)               | 23 (48.94%)                  |                    |
| <b>Current and previous smokers</b> | No                                           | 34 (36.17%)               | 15 (31.91%)                  | <sup>1</sup> 0.330 |
|                                     | Yes                                          | 57 (60.64%)               | 32 (68.09%)                  |                    |
|                                     | NA                                           | 3 (3.19%)                 | 0 (0%)                       | -                  |
| <b>Most relevant comorbidities</b>  | Hypertension                                 | 57 (60.64%)               | 27 (57.45%)                  | <sup>1</sup> 0.720 |
|                                     | Cardiovascular disease                       | 27 (28.72%)               | 14 (29.79%)                  | <sup>1</sup> 0.843 |
|                                     | Asthma/chronic obstructive pulmonary disease | 25 (26.6%)                | 13 (27.66%)                  | <sup>1</sup> 0.552 |
|                                     | Diabetes mellitus                            | 21 (22.34%)               | 6 (12.77%)                   | <sup>1</sup> 0.182 |
|                                     | Previous thoracic surgery                    | 8 (8.51%)                 | 5 (10.64%)                   | <sup>1</sup> 0.760 |
| <b>Preoperative medications</b>     | Anti-hypertensive agents                     | 49 (52.13%)               | 26 (55.32%)                  | <sup>1</sup> 0.858 |
|                                     | Rhythm/frequency control agents              | 38 (40.43%)               | 16 (34.04%)                  | <sup>1</sup> 0.582 |
|                                     | Anticoagulants, antiaggregants               | 30 (31.91%)               | 14 (29.79%)                  | <sup>1</sup> 0.849 |
|                                     | Other cardiovascular drugs (incl. diuretics) | 8 (8.51%)                 | 10 (21.28%)                  | <sup>1</sup> 0.058 |
|                                     | Pulmonological drugs                         | 21 (22.34%)               | 8 (17.02%)                   | <sup>1</sup> 0.515 |
|                                     | Statins                                      | 16 (17.02%)               | 8 (17.02%)                   | <sup>1</sup> 0.587 |
|                                     | Antidiabetics (incl. insulin)                | 17 (18.09%)               | 2 (4.26%)                    | <sup>1</sup> 0.034 |
|                                     | Psychiatric drugs                            | 19 (20.21%)               | 9 (19.15%)                   | <sup>1</sup> 0.536 |
|                                     | Other medications                            | 26 (27.66%)               | 8 (17.02%)                   | <sup>1</sup> 0.211 |

<sup>1</sup> Fisher's exact test; <sup>2</sup> t-test; <sup>3</sup> Does not meet the criteria for Pearson's chi-squared test; <sup>4</sup> Pearson chi-squared. Normality was tested via visual interpretation (Q-Q plot). Continuous variables were tested via an independent samples t-test to compare differences between groups, whereas categorical variables were analyzed using Pearson's chi-squared test and Fisher's exact test to compare the proportions of groups.
